# Supplementary material for: Leaf hydraulic conductance declines in coordination with photosynthesis, transpiration and leaf water status as soybean leaves age regardless of soil moisture
Source: PubMed Central journal article supplement (PMC4246190; doi:10.1093/jxb/eru380), 2014-10-03
Supplement: supp_eru380_jexbot128470_file001.pdf [file supp_eru380_jexbot128470_file001.pdf]

Table S1. Measurement dates and LI-6400 settings for mid-day gas exchange measurements. Light and temperature for gas exchange measurements were based on ambient weather conditions.  $A$ ,  $g_s$ , and  $\Psi_{\text{leaf}}$  were measured at mid-day on the dates shown, and leaves were sampled before sunrise the following morning for  $K_{\text{leaf}}$  measurements.

| Node | Stage | Date              | PAR ( $\mu\text{mol m}^{-2} \text{s}^{-1}$ ) | Block temperature ( $^{\circ}\text{C}$ ) |
|------|-------|-------------------|----------------------------------------------|------------------------------------------|
| 3    | A     | 8 July 2011       | 1700                                         | 30.0                                     |
| 3    | B     | 4 August 2011     | 875                                          | 29.0                                     |
| 3    | C     | 12 September 2011 | 300                                          | 28.0                                     |
| 10   | A     | 28 July 2011      | 1600                                         | 31.0                                     |
| 10   | B     | 27 August 2011    | 1500                                         | 28.0                                     |
| 10   | C     | 14 September 2011 | 300                                          | 20.0                                     |
| 3    | A     | 7 July 2013       | 2500                                         | 28.0                                     |
| 3    | B1    | 25 July 2013      | 500                                          | 28.0                                     |
| 3    | B2    | 9 August 2013     | 300                                          | 30.0                                     |
| 3    | C     | 4 September 2013  | 300                                          | 27.0                                     |
| 10   | A     | 31 July 2013      | 1000                                         | 24.0                                     |
| 10   | B1    | 9 August 2013     | 500                                          | 30.0                                     |
| 10   | B2    | 27 August 2013    | 1000                                         | 31.0                                     |
| 10   | C     | 13 September 2013 | 1000                                         | 24.0                                     |
| 5    | A     | 5 February 2013   | 1000                                         | 25.0                                     |
| 5    | B     | 19 February 2013  | 300                                          | 25.0                                     |
| 8    | A     | 17 February 2013  | 1000                                         | 25.0                                     |
| 8    | B     | 2 March 2013      | 1000                                         | 25.0                                     |
